# Supplementary material for: A high-quality carrot genome assembly provides new insights into carotenoid accumulation and asterid genome evolution
Source: Springer Nature journal article supplement (doi:10.1038/ng.3565), 2016-05-09
Supplement: 41588_2016_BFng3565_MOESM297_ESM.pdf [file 41588_2016_BFng3565_MOESM297_ESM.pdf]

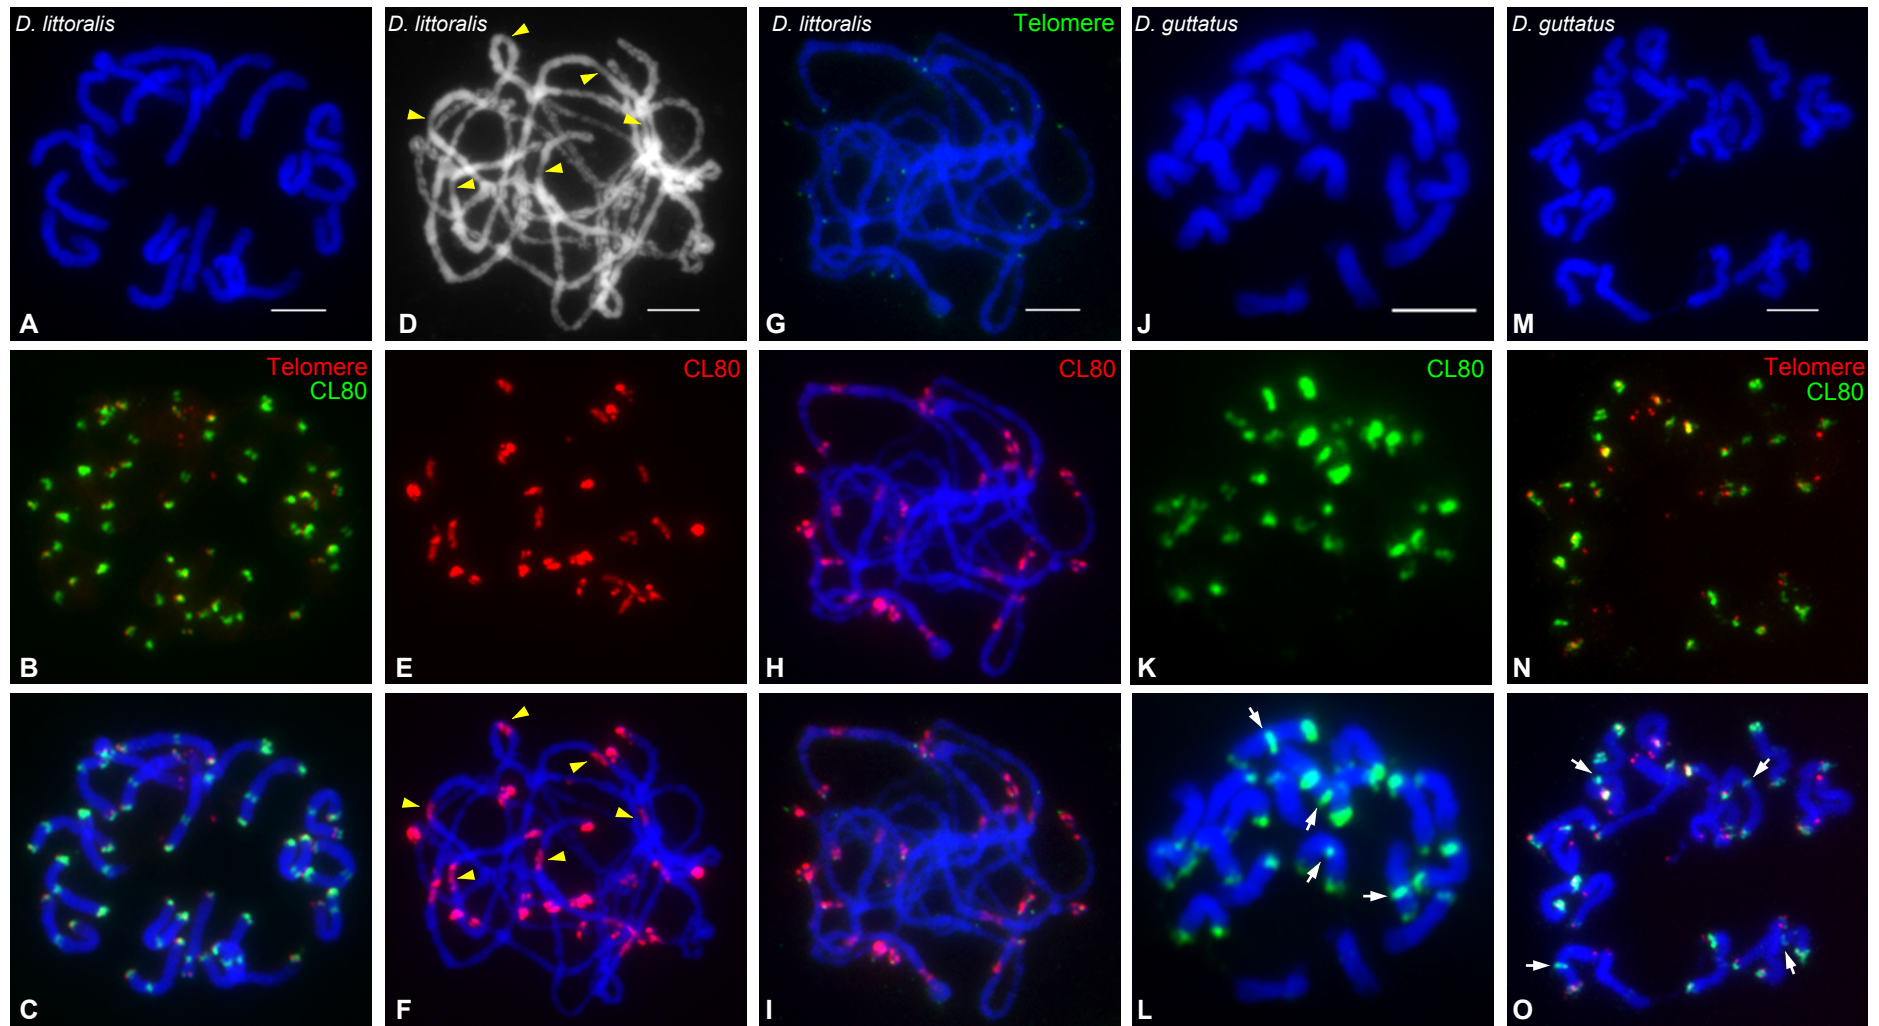

**Supplementary Figure 10.** FISH analysis of the CL80 repeat in *Daucus* species with  $2n=20$ . (A) A somatic metaphase cell of *D. littoralis*. (B) FISH signals derived from the CL80 (green) and a telomeric probe (red). (C) Merged image of (A) and (B). CL80 repeat generated interstitial FISH signals on all chromosomes. (D) DAPI-stained meiotic pachytene chromosomes of *D. littoralis* converted to black and white image. (E) FISH signals from the CL80 repeat (red). (F) Merged image of (D) and (E). The interstitial CL80-repeat sites likely span the centromeres of *D. littoralis* chromosomes; yellow arrowheads in (D) and (F) point to several interstitial sites. (G-I) FISH of the telomeric probe (green, G) and the CL80 repeat (red, H) on pachytene chromosomes of *D. littoralis*. (I) Merged image of (G) and (H). (J) A somatic metaphase cell of *D. guttatus*. (K) FISH signals derived from CL80 repeat. (L) Image merged from (J) and (K); white arrows point to four unambiguous interstitial signals. (M) A somatic metaphase cell of *D. guttatus*. (N) FISH signals derived from the CL80 repeat (green) and the telomeric DNA probe (red). (O) A merged image of (M) and (N). Most CL80 signals co-localized with the telomeres. White arrows point to four interstitial signals. Bars = 5  $\mu$ m.
